# Supplementary material
Source: PubMed Central journal article supplement (PMC4304584)
Supplement: CJP-2014-vol59-December-649-654-eTable-1.pdf [file CJP-2014-vol59-December-649-654-eTable-1.pdf]

Lam RW, Kennedy SH, McIntyre RS, et al. Cognitive dysfunction in major depressive disorder: effects on psychosocial functioning and implications for treatment. *Can J Psychiatry*. 2014;59(12):639–648.

Table 1. Summary of primary articles evaluating the associations between psychosocial functioning and cognition, and between antidepressant treatment and cognitive outcomes in MDD (listed in chronological order).

| Reference                                                          | Subjects                                    | Age (yr)    | Gender (% F) | Baseline HAM-D-17 / MADRS | Study design              | Outcomes                                                                                                     |
|--------------------------------------------------------------------|---------------------------------------------|-------------|--------------|---------------------------|---------------------------|--------------------------------------------------------------------------------------------------------------|
| <i>Associations between psychosocial functioning and cognition</i> |                                             |             |              |                           |                           |                                                                                                              |
| McCall and Dunn, 2003 <sup>62</sup>                                | 77 inpatients with severe MDD, prior to ECT | 56.7 ± 15.8 | 64           | 28.9 ± 5.0                | Cross-sectional study     | Global cognition score correlated with activities of daily living.                                           |
| Jaeger et al, 2006<br><b>Error! Bookmark not defined.</b>          | 48 inpatients with MDD                      | 39.6 ± 12.7 | 67           | 16.5 ± 7.1                | 6-month prospective study | Objective measures of non-verbal, learning, and motor at baseline predicted functional outcomes at 6 months. |
| Naismith et al, 2007<br><b>Error! Bookmark not defined.</b>        | 21 patients with MDD and matched controls   | 53.9 ± 11.8 | 76           | 21.7 ± 4.4                | Cross-sectional study     | Self-rated cognitive deficits and objectively-measured psychomotor function predicted physical disability.   |

|                                                                                    |                                                                  |             |    |                                                 |                           |                                                                                                                                                                                                                                                                                                             |
|------------------------------------------------------------------------------------|------------------------------------------------------------------|-------------|----|-------------------------------------------------|---------------------------|-------------------------------------------------------------------------------------------------------------------------------------------------------------------------------------------------------------------------------------------------------------------------------------------------------------|
| Buist-Bouwman et al, 2008 <sup>Error!</sup><br><b>Bookmark not defined.</b>        | 21,425 adults; 847 (4.0%) reported MDD episode in last 12 months | -           | -  | -                                               | Cross-sectional study     | Strong association between MDD and psychosocial function. Concentration, attention, and embarrassment mediated the relationship between MDD and function.                                                                                                                                                   |
| Withall et al, 2009 <sup>63</sup>                                                  | 48 inpatients with MDD                                           | 38.0 ± 10.6 | 67 | 28.3 ± 5.7 at baseline; 10.7 ± 6.0 at follow up | 4 month prospective study | Deficits in several neurocognitive domains predicted functional outcome at 4 months followup.                                                                                                                                                                                                               |
| Baune et al, 2010 <sup>Error!</sup><br><b>Bookmark not defined.</b>                | 26 outpatients, current MDD                                      | 46.0 ± 12.1 | 27 | 18.0 ± 5.9                                      | Cross-sectional study     | Current MDD = lower cognition scores in all domains vs. healthy controls, and in visuo-spatial /constructional and attention vs. previous MDD.<br>Previous MDD = lower score in immediate memory and attention vs. healthy controls.<br>Employment status was associated with deficits in cognition scores. |
|                                                                                    | 44 patients with previous MDD                                    | 44.2 ± 15.9 | 73 | 6.8 ± 4.3                                       |                           |                                                                                                                                                                                                                                                                                                             |
| Godard et al, 2011 <sup>64</sup>                                                   | 16 outpatients with MDD                                          | 49.5 ± 12.3 | 81 | 31.2 ± 5.1 (29-item)                            | Cross-sectional study     | Significant correlations between neuropsychological deficits and functional impairment.                                                                                                                                                                                                                     |
| <b><i>Associations between antidepressant treatment and cognitive outcomes</i></b> |                                                                  |             |    |                                                 |                           |                                                                                                                                                                                                                                                                                                             |

| Reference                                                   | Subjects                                                             | Age (yr)                    | Gender (% F) | Baseline HAM-D-17 / MADRS                   | # of episodes                          | Study design                                                                 | Cognitive outcomes                                                                                                                                                       |
|-------------------------------------------------------------|----------------------------------------------------------------------|-----------------------------|--------------|---------------------------------------------|----------------------------------------|------------------------------------------------------------------------------|--------------------------------------------------------------------------------------------------------------------------------------------------------------------------|
| Meyers et al, 1991<br><b>Error! Bookmark not defined.</b>   | 9 patients with MDD treated with nortriptyline                       | 73.4 ± 8                    | -            | Nortriptyline: 5.0 ± 3<br>Placebo : 6.7 ± 3 | -                                      | Cross-over design. 8-26 weeks of nortriptyline followed by 1 week of placebo | Nortriptyline worsened immediate, but not delayed, free recall. No difference between placebo and nortriptyline on measures of immediate and delayed recognition memory. |
| Constant et al, 2005<br><b>Error! Bookmark not defined.</b> | 20 outpatients with MDD treated with sertraline and matched controls | 47.7 (range: 21-74)         | 60           | Baseline BDI: 25.6 ± 8.0                    | 1 <sup>st</sup> or 2 <sup>nd</sup> MDE | 7-week prospective study                                                     | Patients with MDD: disturbances in attention, executive, and psychomotor function vs. controls. Sertraline improved attention, executive, and psychomotor function.      |
| Ferguson et al, 2003<br><b>Error! Bookmark not defined.</b> | 25 patients with MDD treated with reboxetine                         | Range: 18-65, as per design | -            | >20, as per design                          | -                                      | Two 8-week, placebo-controlled, double-blind RCTs                            | Reboxetine: improved sustained attention and cognitive functioning speed at day 56 vs. baseline.<br>Paroxetine and placebo: no significant effect on                     |
|                                                             | 23 patients with MDD treated with paroxetine                         |                             | -            |                                             | -                                      |                                                                              |                                                                                                                                                                          |

|                                                              |                                                  |            |    |            |            |                                             |                                                                                                                                                                                                                                                                                                         |
|--------------------------------------------------------------|--------------------------------------------------|------------|----|------------|------------|---------------------------------------------|---------------------------------------------------------------------------------------------------------------------------------------------------------------------------------------------------------------------------------------------------------------------------------------------------------|
|                                                              | 74 patients with MDD treated with placebo        |            | -  |            | -          |                                             | these cognitive endpoints.                                                                                                                                                                                                                                                                              |
| Gualtieri et al, 2007<br><b>Error! Bookmark not defined.</b> | 27 outpatients with MDD treated with SSRI        | 43.8       | 59 | -          | -          | Cross-sectional study                       | SSRI patients: scored lower on psychomotor speed, cognitive flexibility, and reaction time vs. matched controls.<br>Venlafaxine patients: scored lower on reaction test during a Stroop test vs. matched controls.<br>Bupropion patients: did not differ from matched controls in any cognitive domain. |
|                                                              | 27 outpatients with MDD treated with venlafaxine | 46.1       | 59 | -          | -          |                                             |                                                                                                                                                                                                                                                                                                         |
|                                                              | 27 outpatients with MDD treated with bupropion   | 44.0       | 74 | -          | -          |                                             |                                                                                                                                                                                                                                                                                                         |
|                                                              | 27 matched controls                              | 43.8       | 63 | -          | -          |                                             |                                                                                                                                                                                                                                                                                                         |
| Raskin et al, 2007<br><b>Error! Bookmark</b>                 | 207 outpatients with MDD treated with duloxetine | 72.6 ± 5.7 | 60 | 22.4 ± 3.8 | 5.0 ± 15.0 | 8-week placebo-controlled, double-blind RCT | Duloxetine: significant improvement in composite cognitive score vs. placebo (improvement mainly                                                                                                                                                                                                        |

|                                                                   |                                                 |            |      |                                                      |            |                                             |                                                                                                                                                                                                                          |
|-------------------------------------------------------------------|-------------------------------------------------|------------|------|------------------------------------------------------|------------|---------------------------------------------|--------------------------------------------------------------------------------------------------------------------------------------------------------------------------------------------------------------------------|
| <b>not defined.</b>                                               | 104 outpatients with MDD treated with placebo   | 73.3 ± 5.7 | 58   | 22.0 ± 3.6                                           | 6.3 ± 13.6 |                                             | driven by verbal learning and memory).                                                                                                                                                                                   |
| Herrera-Guzman et al, 2008<br><b>Error! Bookmark not defined.</b> | 20 outpatients with MDD treated with bupropion  | 24.5 ± 4.7 | 92   | Responders: 26.8 ± 6.1<br>Non-responders: 21.8 ± 3.3 | 5.3 ± 5.5  | 8-week clinical trial                       | Low pretreatment visual memory and processing speed were predictive of good response to bupropion. Visual memory and processing speed improved during treatment.                                                         |
| Culang et al, 2009<br><b>Error! Bookmark not defined.</b>         | 84 outpatients with MDD treated with citalopram | 79.8 ± 4.0 | 54   | 24.4 ± 4.3                                           | -          | 8-week double-blind, placebo-controlled RCT | Citalopram responders: improved in visuospatial functioning vs. non-responders, but not vs. placebo responders. Citalopram responders: improved in psychomotor speed vs. citalopram non-responders, but not vs. placebo. |
|                                                                   | 90 outpatients with MDD treated with placebo    | 79.3 ± 4.7 | 62   | 24.3 ± 3.9                                           | -          |                                             |                                                                                                                                                                                                                          |
| Herrera-Guzman et al,                                             | 36 patients with MDD treated with escitalopram  | 32.9 ± 8.7 | 86.1 | 25.3 ± 4.0                                           | 3.8 ± 4.8  | 24-week clinical trial                      | Both treatments improved episodic memory, working memory, mental                                                                                                                                                         |

|                                                                           |                                                           |            |      |            |           |                                                 |                                                                                                                                                                                                                                                                        |
|---------------------------------------------------------------------------|-----------------------------------------------------------|------------|------|------------|-----------|-------------------------------------------------|------------------------------------------------------------------------------------------------------------------------------------------------------------------------------------------------------------------------------------------------------------------------|
| 2009 <b>Error!</b><br><b>Bookmark not defined.</b>                        | 37 patients with MDD treated with duloxetine              | 33.2 ± 8.6 | 75.7 | 25.1 ± 5.3 | 3.6 ± 3.5 |                                                 | processing speed and motor performance. Duloxetine was more effective than escitalopram at improving episodic and working memory.                                                                                                                                      |
| Herrera-Guzman et al, 2010 <b>Error!</b><br><b>Bookmark not defined.</b>  | 36 patients with MDD previously treated with escitalopram | 32.9 ± 8.7 | 86.1 | 25.3 ± 4.0 | 3.8 ± 4.8 | 24-week follow-up after cessation of medication | Patients with remitted MDD performed worse on verbal and visual memory, attention, and working memory vs. healthy controls. Patients previously treated with a SNRI performed better in episodic visual and verbal memory vs. patients previously treated with a SSRI. |
|                                                                           | 37 patients with MDD previously treated with duloxetine   | 33.2 ± 8.6 | 75.7 | 25.1 ± 5.3 | 3.6 ± 3.5 |                                                 |                                                                                                                                                                                                                                                                        |
| Culang-Reinlieb et al, 2012 <b>Error!</b><br><b>Bookmark not defined.</b> | 33 patients with MDD treated with sertraline              | 64.9 ± 8.8 | 61   | 23.9 ± 4.4 | -         | 12-week clinical trial                          | Sertraline patients: improved more on verbal learning vs. nortriptyline                                                                                                                                                                                                |
|                                                                           | 30 patients with MDD treated with nortriptyline           | 63.5 ± 8.2 | 60   | 24.9 ± 5.4 | -         |                                                 |                                                                                                                                                                                                                                                                        |

|                                                                       |                                                         |             |    |            |           |                                                                          |                                                                                                                     |
|-----------------------------------------------------------------------|---------------------------------------------------------|-------------|----|------------|-----------|--------------------------------------------------------------------------|---------------------------------------------------------------------------------------------------------------------|
| Katona et al, 2012<br><b>Error!</b><br><b>Bookmark not defined.</b>   | 156 elderly patients with MDD treated with vortioxetine | 70.5 ± 4.8  | 69 | 22.7 ± 3.9 | -         | 8-week double-blind, randomized, placebo- and active-controlled trial    | Vortioxetine (LU AA21004), but not duloxetine, improved speed of processing, verbal learning and memory vs. placebo |
|                                                                       | 151 elderly patients with MDD treated with duloxetine   | 70.9 ± 5.5  | 66 | 22.3 ± 3.9 | -         |                                                                          |                                                                                                                     |
|                                                                       | 145 elderly patients with MDD treated with placebo      | 70.3 ± 4.4  | 62 | 22.7 ± 3.9 | -         |                                                                          |                                                                                                                     |
| McIntyre et al, 2014<br><b>Error!</b><br><b>Bookmark not defined.</b> | 195 MDD outpatients treated with vortioxetine 10 mg/d   | 45.4 ± 12.2 | 69 | 31.6 ± 3.8 | 2.3 ± 1.7 | 8-week multinational, double-blind, randomized, placebo-controlled trial | Vortioxetine 10 and 20 mg/d significantly improved a composite of cognitive measures (DSST and RAVLT) vs. placebo   |
|                                                                       | 207 MDD outpatients treated with vortioxetine 10 mg/d   | 46.1 ± 11.8 | 64 | 31.7 ± 3.5 | 2.6 ± 2.1 |                                                                          | Patient-reported cognition was also significantly improved with vortioxetine vs. placebo.                           |

|                                                   |                |    |            |           |  |
|---------------------------------------------------|----------------|----|------------|-----------|--|
| 196 MDD<br>outpatients<br>treated with<br>placebo | 45.6 ±<br>12.1 | 66 | 31.3 ± 3.8 | 2.4 ± 2.0 |  |
|---------------------------------------------------|----------------|----|------------|-----------|--|

Data are presented as mean ± SD unless otherwise noted. '-' denotes that data were not available. BDI: Beck Depression Index; F: females; HAM-D-17: 17-item Hamilton depression scale; MADRS: Montgomery-Asberg Depression Rating Scale; MDD: major depressive disorder; SD: standard deviation; SNRI: serotonin-norepinephrine reuptake inhibitor; SSRI: selective serotonin reuptake inhibitor; RCT: randomized controlled trial; MDE: major depressive episode; DSST: digit symbol substitution test; RAVLT: Ray auditory verbal learning test.
